# Supplementary material for: Simultaneous Determination of Eight Ginsenosides in Rat Plasma by Liquid Chromatography–Electrospray Ionization Tandem Mass Spectrometry: Application to Their Pharmacokinetics
Source: PubMed Central journal article supplement (PMC6332349; doi:10.3390/molecules201219790), 2015-12-03
Supplement: molecules-20-19790-s001.pdf [file molecules-20-19790-s001.pdf]

# Supplementary Materials: Simultaneous Determination of 8 Ginsenosides in Rat Plasma by Liquid Chromatography–Electrospray Ionization Tandem Mass Spectrometry: Application to Their Pharmacokinetics

Li-Yuan Ma, You-Bo Zhang, Qi-Le Zhou, Yan-Fang Yang and Xiu-Wei Yang

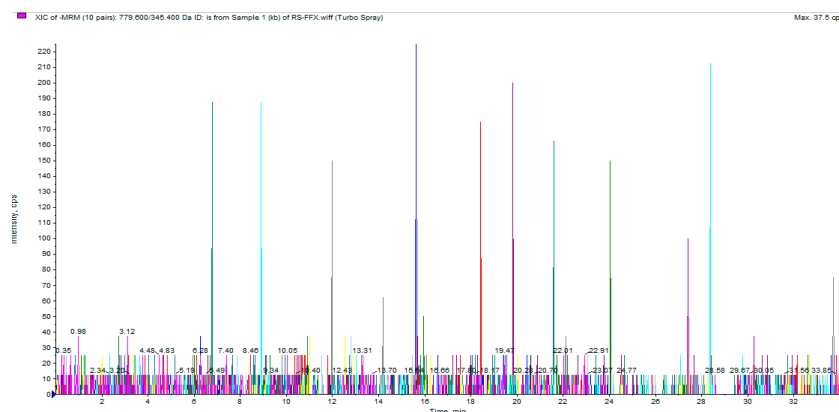

Figure S1. The XIC of blank rat plasma.

Table S1. Intra- and inter-day accuracy and precision of 8 ginsenosides in rat plasma ( $n = 6$ ).

| Ginsenoside | Spiked (ng/mL) | Intra-Day        |         |              | Inter-Day        |         |              |
|-------------|----------------|------------------|---------|--------------|------------------|---------|--------------|
|             |                | Measured (ng/mL) | RSD (%) | Accuracy (%) | Measured (ng/mL) | RSD (%) | Accuracy (%) |
| 1           | 64.80          | 59.22            | 5.89    | 91.39        | 56.40            | 6.23    | 87.04        |
|             | 16.20          | 14.45            | 3.43    | 89.22        | 14.14            | 12.98   | 87.30        |
|             | 0.45           | 0.40             | 10.93   | 89.31        | 0.40             | 9.82    | 88.15        |
| 2           | 42.77          | 39.96            | 3.88    | 93.44        | 37.84            | 6.20    | 88.48        |
|             | 10.69          | 10.44            | 14.18   | 97.62        | 9.41             | 14.87   | 88.02        |
|             | 0.30           | 0.28             | 15.07   | 94.96        | 0.27             | 7.03    | 90.79        |
| 3           | 64.80          | 60.25            | 8.16    | 92.98        | 58.92            | 6.37    | 90.92        |
|             | 16.20          | 14.06            | 2.14    | 86.80        | 14.85            | 14.90   | 91.65        |
|             | 0.45           | 0.41             | 13.98   | 91.20        | 0.42             | 10.37   | 93.78        |
| 4           | 29.81          | 26.90            | 6.25    | 90.24        | 25.64            | 11.89   | 86.01        |
|             | 7.45           | 6.98             | 8.39    | 93.75        | 6.94             | 5.42    | 93.12        |
|             | 0.21           | 0.18             | 8.71    | 87.89        | 0.17             | 13.92   | 81.16        |
| 5           | 49.25          | 45.81            | 4.72    | 93.01        | 45.81            | 4.67    | 93.99        |
|             | 12.31          | 10.97            | 5.58    | 89.09        | 10.57            | 6.62    | 86.49        |
|             | 0.34           | 0.30             | 12.33   | 88.30        | 0.30             | 9.63    | 88.64        |
| 6           | 91.20          | 86.06            | 4.22    | 94.37        | 87.46            | 5.78    | 95.89        |
|             | 22.80          | 19.40            | 13.27   | 85.09        | 19.51            | 10.74   | 85.57        |
|             | 0.95           | 0.82             | 7.00    | 85.91        | 0.79             | 8.07    | 83.15        |
| 7           | 46.66          | 40.45            | 4.78    | 86.69        | 41.35            | 6.15    | 88.61        |
|             | 11.66          | 10.40            | 11.37   | 100.89       | 11.47            | 13.71   | 98.36        |
|             | 0.32           | 0.33             | 11.37   | 100.89       | 0.31             | 18.40   | 96.66        |
| 8           | 54.43          | 51.54            | 4.07    | 94.69        | 48.68            | 7.60    | 89.44        |
|             | 13.61          | 11.87            | 11.07   | 87.21        | 11.60            | 7.33    | 85.20        |
|             | 0.38           | 0.32             | 15.79   | 83.09        | 0.33             | 16.14   | 87.11        |

**Table S2.** Stability of 8 ginsenosides in rat plasma.

| Ginsenoside | Spiked (ng/mL) | Short-Term Stability |         |              | Freeze/Thaw Stability |         |              | Long-Term Stability |         |              |
|-------------|----------------|----------------------|---------|--------------|-----------------------|---------|--------------|---------------------|---------|--------------|
|             |                | Measured (ng/mL)     | RSD (%) | Accuracy (%) | Measured (ng/mL)      | RSD (%) | Accuracy (%) | Measured (ng/mL)    | RSD (%) | Accuracy (%) |
| 1           | 64.80          | 52.14                | 5.56    | 80.47        | 56.14                 | 6.07    | 86.63        | 54.88               | 13.42   | 84.69        |
|             | 16.20          | 14.75                | 14.50   | 91.03        | 12.96                 | 8.89    | 80.01        | 13.59               | 14.77   | 83.87        |
|             | 0.45           | 0.36                 | 19.63   | 80.55        | 0.38                  | 12.33   | 85.21        | 0.36                | 15.24   | 80.28        |
| 2           | 42.77          | 34.29                | 14.29   | 80.16        | 34.48                 | 7.87    | 80.61        | 42.09               | 2.92    | 98.42        |
|             | 10.69          | 11.15                | 14.72   | 104.33       | 9.08                  | 14.99   | 84.90        | 9.58                | 8.52    | 89.61        |
|             | 0.30           | 0.26                 | 19.51   | 86.25        | 0.25                  | 15.39   | 84.50        | 0.27                | 13.41   | 90.23        |
| 3           | 64.80          | 60.33                | 8.86    | 93.10        | 60.97                 | 14.09   | 94.09        | 57.70               | 4.17    | 89.05        |
|             | 16.20          | 15.41                | 11.25   | 95.13        | 15.97                 | 13.48   | 98.57        | 14.91               | 7.63    | 92.03        |
|             | 0.45           | 0.38                 | 19.55   | 83.72        | 0.37                  | 14.43   | 81.81        | 0.41                | 16.33   | 91.00        |
| 4           | 29.81          | 30.13                | 8.42    | 101.07       | 27.23                 | 14.66   | 91.33        | 25.58               | 14.90   | 85.80        |
|             | 7.45           | 6.36                 | 10.83   | 85.37        | 6.57                  | 12.07   | 88.14        | 6.02                | 13.48   | 80.87        |
|             | 0.21           | 0.20                 | 19.49   | 95.07        | 0.17                  | 19.46   | 84.25        | 0.19                | 10.22   | 90.71        |
| 5           | 49.25          | 45.91                | 4.72    | 93.21        | 44.19                 | 5.96    | 89.72        | 43.65               | 9.29    | 88.62        |
|             | 12.31          | 12.92                | 13.72   | 104.96       | 12.80                 | 12.45   | 104.02       | 10.49               | 4.92    | 85.19        |
|             | 0.34           | 0.30                 | 19.71   | 89.46        | 0.37                  | 19.10   | 109.56       | 0.29                | 14.14   | 85.92        |
| 6           | 91.20          | 96.54                | 7.03    | 105.86       | 89.60                 | 8.74    | 98.25        | 81.44               | 13.74   | 89.30        |
|             | 22.80          | 19.89                | 13.16   | 87.26        | 18.53                 | 10.40   | 81.28        | 18.79               | 14.49   | 82.43        |
|             | 0.95           | 0.79                 | 16.57   | 83.36        | 0.77                  | 17.71   | 80.93        | 0.78                | 16.33   | 82.48        |
| 7           | 46.66          | 38.57                | 12.12   | 82.66        | 39.99                 | 8.58    | 85.69        | 39.73               | 15.52   | 85.14        |
|             | 11.66          | 11.99                | 14.88   | 102.84       | 10.49                 | 13.97   | 90.01        | 11.24               | 11.12   | 96.41        |
|             | 0.32           | 0.36                 | 18.02   | 112.42       | 0.35                  | 19.41   | 106.96       | 0.32                | 18.24   | 99.32        |
| 8           | 54.43          | 46.86                | 11.03   | 86.09        | 46.04                 | 3.89    | 84.59        | 45.96               | 13.62   | 84.44        |
|             | 13.61          | 11.13                | 8.72    | 81.78        | 10.91                 | 10.60   | 80.13        | 12.07               | 6.73    | 88.65        |
|             | 0.38           | 0.41                 | 12.30   | 108.31       | 0.31                  | 19.86   | 81.23        | 0.36                | 7.10    | 94.32        |
